# Supplementary material for: Early skin-to-skin contact between healthy late preterm infants and their parents: an observational cohort study
Source: PeerJ. 2017 Oct 30;5:e3949. doi: 10.7717/peerj.3949 (PMC5667536; doi:10.7717/peerj.3949)
Supplement: Data S1 — Dataset for late preterm infants. [file peerj-05-3949-s001.xlsx]

## Sheet: Supplemental file Peer J 2
Infant ID number	Time-point birth, 24 h clock	Time of birth (1= Day-time 07:00-18.59; 2= Night-time 19.00-06:59)	Skin-to-skin contact with mother first day after birth (24 h), hours	Skin-to-skin contact mother second day after birth (24 h), hours	Skin-to-skin contact with father first day after birth (24 h), hours	Skin-to-skin contact with father second day after birth (24 h), hours	Primipara or Multipara (1= Primipara; 2= Multipara)	Mother age, years	Caesarean section (0= no; 1= yes)	Mode of delivery (0= vaginal delivery; 1= elective caesarean section; 2= acute caesarean section)	Completed weeks of gestation (0= =>36,0; 1= <36,0)	Completed weeks and days of gestation	Post-partum bleeding >1000 ml (0= no; 1= yes) Blödning mer än 1000ml	Vacuum extraction (0= no; 1= yes)	Induction of childbirth (0= no; 1= yes)	Signs of fetal asphyxia according to fetal heart rate monitoring (0= no; 1= yes)	Large perineal tears (0= no; 1= yes)	Manual extraction of placenta (0= no; 1= yes)	Infant's sex (1= boy; 2= girl)	Infant's birthweight, kg	Supplementary artificial milk feeds (0= not given; 1= given)																				Tillmatord	Är tillmat ordinerat dag 1	Ordinerad matmängd dag 1 i ml	Given matmängd dag 1 i ml	Ordinerad matmängd dag 1 minus given matmängd dag 1. Räknas ut i SPSS	Är tillmat ordinerat dag 2	Ordinerad matmängd dag 2 i ml	Given matmängd dag 2 i ml	Ordinerad matmängd dag 2 minus given matmängd dag 2. Räknas ut i SPSS
6	17.58	1	16.25	0	6	0	2	29	0	0	0	36.57	0	0	0	0	0	0	1	3.12	0																				0	nej	#NULL!	#NULL!	#NULL!	nej	#NULL!	#NULL!	#NULL!
18	12.25	1	21.5	22.5	1.5	0	2	28	0	0	0	36.57	0	0	0	0	0	0	2	2.92	0																				0	nej	#NULL!	#NULL!	#NULL!	nej	#NULL!	#NULL!	#NULL!
22	5.3	2	21	19.5	3	4	2	31	0	0	0	36.72	0	1	0	0	0	0	2	3.34	0																				0	nej	#NULL!	#NULL!	#NULL!	nej	#NULL!	#NULL!	#NULL!
23	14.2	1	18.5	0	0.5	0	2	34	0	0	0	36.72	0	0	0	0	0	0	1	3.23	0																				0	nej	#NULL!	#NULL!	#NULL!	nej	#NULL!	#NULL!	#NULL!
26	11.43	1	23	24	0	0	2	29	0	0	0	36.72	0	0	0	0	0	0	2	2.55	0																				0	nej	#NULL!	#NULL!	#NULL!	nej	#NULL!	#NULL!	#NULL!
30	11.03	1	18	17	3.5	7	1	26	0	0	0	36.72	0	0	0	0	0	0	2	2.71	0																				0	nej	#NULL!	#NULL!	#NULL!	nej	#NULL!	#NULL!	#NULL!
31	9.15	1	7.5	4	5	4.5	2	29	0	0	0	36	0	0	1	0	0	0	2	2.76	0																				0	nej	#NULL!	#NULL!	#NULL!	nej	#NULL!	#NULL!	#NULL!
39	9.5	1	5.5	3.5	0.5	0	2	30	0	0	0	36.57	0	0	0	0	0	0	2	3.37	0																				0	nej	#NULL!	#NULL!	#NULL!	Vid behov	#NULL!	#NULL!	#NULL!
46	5.39	2	15.5	10	6	3.75	2	32	1	2	0	36.72	0	0	0	0	0	0	2	2.95	0																				0	nej	#NULL!	#NULL!	#NULL!	nej	#NULL!	#NULL!	#NULL!
47	10.26	1	11	7	9	6	2	32	1	2	0	36.86	0	0	1	0	0	0	2	2.98	0																				0	nej	#NULL!	#NULL!	#NULL!	nej	#NULL!	#NULL!	#NULL!
72	5.04	2	17.5	2.75	3.5	4	1	33	0	0	0	36.29	0	0	0	0	0	0	1	3.25	0																				0	nej	#NULL!	#NULL!	#NULL!	nej	#NULL!	#NULL!	#NULL!
73	5.36	2	5.5	3.5	8.5	8.5	1	27	0	0	0	36.29	0	0	0	0	0	0	1	2.7	0																				0	nej	#NULL!	#NULL!	#NULL!	nej	#NULL!	#NULL!	#NULL!
79	20.12	2	12.75	13	7	10	1	31	0	0	0	36.72	0	0	1	0	0	0	1	2.68	0																				0	nej	#NULL!	#NULL!	#NULL!	x12	268	#NULL!	#NULL!
85	10.05	1	23	23	0	0	2	29	0	0	0	36.86	0	0	0	0	0	0	1	3.37	0																				0	nej	#NULL!	#NULL!	#NULL!	nej	#NULL!	#NULL!	#NULL!
87	4.08	2	13	13.5	6.5	6.75	2	33	0	0	0	36.86	0	0	0	0	0	0	2	3.09	0																				0	nej	#NULL!	#NULL!	#NULL!	x8	208	90	#NULL!
88	17.59	1	12	9.75	8.75	4	1	25	0	0	0	36.29	0	0	1	1	0	0	1	3.125	0																				0	nej	#NULL!	#NULL!	#NULL!	nej	#NULL!	#NULL!	#NULL!
93	5.15	2	18.5	7.75	4.5	1	2	40	0	0	0	36	0	0	0	0	0	0	2	2.57	0																				0	nej	#NULL!	#NULL!	#NULL!	nej	#NULL!	#NULL!	#NULL!
97	10.46	1	12.25	13	11	7	2	22	1	1	0	36.29	0	0	0	0	0	0	1	2.99	0																				0	nej	#NULL!	#NULL!	#NULL!	x12	299	#NULL!	#NULL!
99	3.4	2	20	20	3.5	3	2	25	0	0	0	36	0	0	0	0	0	0	2	2.99	0																				0	nej	#NULL!	#NULL!	#NULL!	nej	#NULL!	#NULL!	#NULL!
105	14.44	1	15	14	3	6	1	25	0	0	0	36.43	0	0	0	0	0	0	2	2.82	0																				0	nej	#NULL!	#NULL!	#NULL!	x12	192	192	#NULL!
106	15.46	1	14.5	10.5	4	2	1	26	0	0	0	36.14	0	0	1	0	0	0	2	2.49	0																				0	nej	#NULL!	#NULL!	#NULL!	nej	#NULL!	#NULL!	#NULL!
109	16.44	1	24	0	0	0	2	24	0	0	0	36.72	0	0	1	0	0	0	2	2.99	0																				0	nej	#NULL!	#NULL!	#NULL!	nej	#NULL!	#NULL!	#NULL!
1	18.53	1	16.25	0	5	0	2	40	1	2	0	36.43	1	0	0	0	0	0	2	2.96	1																				1	x8	226	#NULL!	#NULL!	#NULL!	281	270	#NULL!
3	19.23	2	17	19	4.5	5	1	28	0	0	1	35.29	0	0	0	1	0	0	1	2.53	1																				1	x12	230	200	#NULL!	ja	253	316	#NULL!
4	11.28	1	9.5	4.5	8.75	5.25	1	38	0	0	0	36.43	0	0	0	0	0	0	1	2.35	1																				1	x12	240	145	#NULL!	ja	470	235	#NULL!
5	22.15	2	14.25	12	9.75	12	1	35	0	0	0	36.72	0	0	0	0	0	0	1	2.6	1																				1	x12	#NULL!	#NULL!	#NULL!	Vid behov	#NULL!	#NULL!	#NULL!
7	15.29	1	0	6	14	9	1	34	1	2	0	36.72	0	0	0	0	0	0	1	2.44	1																				1	x12	224	230	#NULL!	x8	249	#NULL!	#NULL!
8	14.57	1	16.5	10.5	4.5	8.5	1	26	0	0	1	35.86	0	0	0	0	0	0	1	2.75	1																				1	x12	243	225	#NULL!	x8	261	225	#NULL!
11	1.14	2	14.5	0	0	0	1	30	0	0	0	36.43	0	0	0	0	0	0	1	3.375	1																				1	x12	#NULL!	#NULL!	#NULL!	uppgift saknas i jounal	#NULL!	#NULL!	#NULL!
13	16.36	1	10	7.5	0.5	0	2	31	0	0	1	35.86	0	0	0	0	0	0	1	3	1																				1	x12	240	#NULL!	#NULL!	x12	300	#NULL!	#NULL!
14	22.35	2	14.5	0	1	0	1	26	0	0	0	36	0	0	0	0	0	0	1	2.49	1																				1	x8	373	#NULL!	#NULL!	x8	249	#NULL!	#NULL!
15	12.47	1	19.5	0	4.5	0	2	35	1	2	0	36.29	0	0	0	0	0	0	1	3.25	1																				1	vid behov	#NULL!	#NULL!	#NULL!	Vid behov	#NULL!	#NULL!	#NULL!
19	19.01	2	20	10.5	3.5	13.5	1	25	0	0	1	34.86	0	0	0	0	0	0	2	2.325	1																				1	x12	210	210	#NULL!	x12	233	260	#NULL!
20	17.22	1	12	13.5	3.5	2.75	1	30	0	0	1	35.72	0	0	1	0	0	0	2	3.04	1																				1	x12	243	235	#NULL!	x12	304	310	#NULL!
21	3.4	2	20	12.5	3.5	6	2	21	0	0	1	35.86	0	0	1	0	1	0	2	2.865	1																				1	x12	260	167	#NULL!	x8	287	#NULL!	#NULL!
33	1.2	2	14	0	3.25	0	2	22	0	0	0	36.57	0	0	0	0	0	0	1	2.82	1																				1	x8	254	#NULL!	#NULL!	Vid behov	#NULL!	#NULL!	#NULL!
35	0.3	2	21	12.5	2	1.25	1	37	0	0	1	35.72	0	0	0	0	0	0	1	3.1	1																				1	12	279	317	#NULL!	x12	310	360	#NULL!
38	1.05	2	11.5	0	0.75	0	2	37	1	2	0	36.72	0	0	0	0	0	0	1	3.04	1																				1	12	273	249	#NULL!	uppgift saknas i jounal	304	#NULL!	#NULL!
40	10.03	1	0	0	2.75	0	2	40	1	1	1	35.72	0	0	0	0	0	0	1	2.89	1																				1	x12	260	335	#NULL!	x12	289	240	#NULL!
41	21.56	2	15	2.5	7	6.5	1	29	0	0	1	34.72	0	0	1	0	0	0	1	3	1																				1	x12	240	125	#NULL!	x12	300	123	#NULL!
49	3.3	2	8	8.5	11.5	3	2	37	0	0	1	35.14	0	0	0	0	0	1	1	2.44	1																				1	ja	220	110	#NULL!	ja	244	115	#NULL!
54	10.37	1	23.5	10	1	2.5	1	36	0	0	0	36.14	0	0	0	0	0	0	2	2.72	1																				1	vid behov	#NULL!	#NULL!	#NULL!	x12	#NULL!	#NULL!	#NULL!
55	15.42	1	7	6.5	5	3.75	1	29	0	0	1	35	0	1	0	0	0	0	1	2.92	1																				1	12	262	295	#NULL!	x12	292	#NULL!	#NULL!
59	19.11	2	10	6	7	0.75	2	25	0	0	0	36.86	0	0	0	0	0	0	2	2.72	1																				1	vid behov	#NULL!	#NULL!	#NULL!	Vid behov	#NULL!	#NULL!	#NULL!
62	1.3	2	13	4.25	5.75	2.5	1	27	0	0	1	35.57	0	0	0	0	0	0	1	2.77	1																				1	x12	249	195	#NULL!	Vid behov	249	301	#NULL!
63	3.59	2	19	16	1	4	2	33	0	0	1	35.86	0	0	0	0	0	0	2	2.68	1																				1	x12	241	170	#NULL!	x12	#NULL!	#NULL!	#NULL!
65	22.32	2	23	13.5	0	0	2	31	0	0	1	35.86	0	0	0	0	0	0	2	2.7	1																				1	x8	80	#NULL!	#NULL!	x8	200	#NULL!	#NULL!
66	0.34	2	10	9.5	9.75	4.5	1	22	0	0	0	36.57	0	0	1	0	0	0	2	2.74	1																				1	6	164	145	#NULL!	x8	274	176	#NULL!
67	18.27	1	11	4.5	4.75	1	1	31	0	0	1	35.29	0	0	0	0	0	0	1	2.95	1																				1	x12	266	266	#NULL!	x12	295	350	#NULL!
71	21.33	2	5.75	0	0	0	2	26	0	0	0	36.29	0	0	0	0	0	0	2	3.48	1																				1	vid behov	#NULL!	#NULL!	#NULL!	Vid behov	#NULL!	#NULL!	#NULL!
74	17.17	1	14	12.25	8	8.5	1	34	1	2	0	36.29	0	0	0	0	0	0	2	2.49	1																				1	x12	224	#NULL!	#NULL!	x12	249	#NULL!	#NULL!
80	8.5	1	17	11	4	1	2	34	1	2	0	36.43	0	0	0	0	0	0	2	2.61	1																				1	x12	204	#NULL!	#NULL!	x8	#NULL!	#NULL!	#NULL!
82	8.02	1	19	24	0	0	2	32	1	2	0	36.14	0	0	0	0	0	0	2	2.84	1																				1	x12	255	280	#NULL!	x8	284	#NULL!	#NULL!
84	21.58	2	15	1.25	3	0.75	2	35	0	0	1	35.86	0	0	0	0	0	0	1	3.76	1																				1	x12	#NULL!	170	#NULL!	x12	376	170	#NULL!
90	23.07	2	13	15	7	0	2	35	0	0	0	36.43	0	0	0	0	0	0	1	2.71	1																				1	x12	243	315	#NULL!	x12	271	285	#NULL!
92	3.16	2	10.25	4.5	8.5	2.5	1	30	0	0	0	36.43	0	0	0	0	0	0	1	3.11	1																				1	x12	280	275	#NULL!	x12	311	298	#NULL!
98	9	1	16.5	12.5	5	2.25	1	40	1	2	0	36.14	0	0	0	0	0	0	1	2.27	1																				1	x12	341	305	#NULL!	x12	227	425	#NULL!
100	1.15	2	13.5	8.5	7	3	2	31	0	0	1	35.29	0	0	0	0	0	0	1	3.025	1																				1	x12	272	140	#NULL!	x12	302	170	#NULL!
104	15.09	1	22	22.25	2	1	2	31	0	0	1	35.86	0	0	1	0	0	0	1	2.34	1																				1	x12	210	105	#NULL!	x12	234	145	#NULL!
107	8	1	17	21.5	6	2	1	26	1	2	1	35.14	0	0	0	0	0	0	2	2.8	1																				1	x12	252	201	#NULL!	x12	280	287	#NULL!
110	9.36	1	23	0	1	0	1	34	0	0	1	35.57	0	0	1	0	0	0	2	2.65	1																				1	x12	360	207	#NULL!	x12	265	334	#NULL!
111	6.32	2	14.5	8.5	6	5	2	26	0	0	0	36.86	0	0	0	0	0	0	2	3.33	1																				1	x12	250	240	#NULL!	x12	333	#NULL!	#NULL!
112	8.43	1	5.5	5.5	4.5	1.5	1	19	0	0	0	36.57	0	0	0	0	0	0	2	2.9	1																				1	x12	262	#NULL!	#NULL!	#NULL!	#NULL!	#NULL!	#NULL!
113	11.29	1	19	16.5	3	3	2	34	0	0	1	35.14	0	0	1	0	0	0	1	2.445	1																				1	x12	204	240	#NULL!	x12	235	252	#NULL!
[truncated: 38 more columns]
